# Supplementary material
Source: PubMed Central journal article supplement (PMC7030900)
Supplement: NIHMS1067397-supplement-2.pdf [file NIHMS1067397-supplement-2.pdf]

Supplementary Table 1. Time spent (minutes) in different intensities by metabolic equivalent

|          | Normal Weight |      |         |      |          |      | Overweight/Obesity |      |         |      |          |      |
|----------|---------------|------|---------|------|----------|------|--------------------|------|---------|------|----------|------|
|          | Fruit Ninja   |      | Kung-Fu |      | Shape Up |      | Fruit Ninja        |      | Kung-Fu |      | Shape Up |      |
| Light    | 4.3           | ±3.8 | 2.6     | ±3.3 | 1.7      | ±1.4 | 6.7                | ±3.2 | 3.9     | ±3.0 | 2.8      | ±1.6 |
| Moderate | 5.3           | ±3.8 | 6.0     | ±3.1 | 5.9      | ±1.8 | 2.9                | ±3.2 | 5.5     | ±3.2 | 5.3      | ±2.4 |
| Vigorous | 0.4           | ±1.1 | 1.2     | ±1.9 | 1.8      | ±1.9 | 0.0                | ±0.0 | 0.0     | ±0.0 | 0.4      | ±0.8 |
| MVPA     | 5.7           | ±4.1 | 7.1     | ±3.6 | 7.7      | ±2.3 | 2.9                | ±3.2 | 5.5     | ±3.2 | 5.6      | ±2.7 |

Data are presented as means ± standard deviation.
